# Supplementary material for: Chi3l1 Is a Modulator of Glioma Stem Cell States and a Therapeutic Target in Glioblastoma
Source: PubMed Central journal article supplement — Cancer Res. 2023 Apr 27;83(12):1984–99. doi: 10.1158/0008-5472.CAN-21-3629 (PMC10267676; doi:10.1158/0008-5472.can-21-3629), 2023-04-27
Supplement: can-21-3629_supplementary_table_1_suppst1.pdf [file can-21-3629_supplementary_table_1_suppst1.pdf]

Suppl. Table 1-common\_genes\_across\_gscs (1)

| <b>genes</b>     | <b>description</b>    | <b>comment</b>      |
|------------------|-----------------------|---------------------|
| <b>PTX3</b>      | Immune modulator      |                     |
| <b>LGALS1</b>    | Immune modulator      |                     |
| <b>S100B</b>     | Glial marker          |                     |
| <b>Survivin</b>  | Anti-apoptotic factor |                     |
| <b>ASPM</b>      | Stemness regulator    |                     |
| <b>PTTG1</b>     | Stemness regulator    |                     |
| <b>CDC20</b>     | Stemness regulator    |                     |
| <b>CDCA8</b>     | Stemness regulator    |                     |
| <b>HELLS</b>     | Stemness regulator    |                     |
| <b>TUBB</b>      | Stemness regulator    |                     |
| <b>HIST1H1D</b>  | epigenome             |                     |
| <b>HIST1H2AH</b> | epigenome             |                     |
| <b>HIST1H1B</b>  | epigenome             |                     |
| <b>HIST1H1C</b>  | epigenome             |                     |
| <b>HIST1H1E</b>  | epigenome             |                     |
| <b>HIST1H2AG</b> | epigenome             |                     |
| <b>HIST1H2BC</b> | epigenome             |                     |
| <b>HIST1H3B</b>  | epigenome             |                     |
| <b>HIST1H3G</b>  | epigenome             |                     |
| <b>HIST1H4C</b>  | epigenome             |                     |
| <b>HIST2H2AC</b> | epigenome             |                     |
| <b>PRC1</b>      | epigenome             |                     |
| <b>ATAD2</b>     | misc                  | ATPase              |
| <b>BRCA1</b>     | misc                  | DNA damage repair   |
| <b>NEAT1</b>     | misc                  | long non-coding RNA |
| <b>PMP2</b>      | misc                  | pro-myelination     |
| <b>UBE2C</b>     | misc                  | ubiquitin           |
| <b>UHRF1</b>     | misc                  | ubiquitin           |
| <b>USP1</b>      | misc                  | ubiquitin           |

|               |            |  |
|---------------|------------|--|
| <b>AURKA</b>  | cell cycle |  |
| <b>CALB1</b>  | cell cycle |  |
| <b>CCNA2</b>  | cell cycle |  |
| <b>CCNB2</b>  | cell cycle |  |
| <b>CDC6</b>   | cell cycle |  |
| <b>CDCA3</b>  | cell cycle |  |
| <b>CDK1</b>   | cell cycle |  |
| <b>CDKN3</b>  | cell cycle |  |
| <b>CENPA</b>  | cell cycle |  |
| <b>CKAP2</b>  | cell cycle |  |
| <b>CKS2</b>   | cell cycle |  |
| <b>DLGAP5</b> | cell cycle |  |
| <b>E2F1</b>   | cell cycle |  |
| <b>ECT2</b>   | cell cycle |  |
| <b>ESCO2</b>  | cell cycle |  |
| <b>TPX2</b>   | cell cycle |  |
| <b>XRCC2</b>  | cell cycle |  |
| <b>GAS2L3</b> | cell cycle |  |
| <b>KIF14</b>  | cell cycle |  |
| <b>KIF2C</b>  | cell cycle |  |
| <b>KPNA2</b>  | cell cycle |  |
| <b>MCM10</b>  | cell cycle |  |
| <b>MCM2</b>   | cell cycle |  |
| <b>MCM3</b>   | cell cycle |  |
| <b>MCM5</b>   | cell cycle |  |
| <b>MCM6</b>   | cell cycle |  |
| <b>MCM7</b>   | cell cycle |  |
| <b>MKI67</b>  | cell cycle |  |
| <b>MT-ND3</b> | cell cycle |  |
| <b>NEK2</b>   | cell cycle |  |
| <b>NUSAP1</b> | cell cycle |  |
| <b>PCNA</b>   | cell cycle |  |

|               |            |  |
|---------------|------------|--|
| <b>PIMREG</b> | cell cycle |  |
| <b>PLK1</b>   | cell cycle |  |
| <b>PRR11</b>  | cell cycle |  |
| <b>RRM2</b>   | cell cycle |  |
| <b>TOP2A</b>  | cell cycle |  |
| <b>CCNB1</b>  | cell cycle |  |
| <b>CENPE</b>  | cell cycle |  |
| <b>CENPF</b>  | cell cycle |  |
| <b>MCM4</b>   | cell cycle |  |
| <b>SGO2</b>   | cell cycle |  |
| <b>UBE2S</b>  | cell cycle |  |
