# Supplementary material for: Chi3l1 Is a Modulator of Glioma Stem Cell States and a Therapeutic Target in Glioblastoma
Source: PubMed Central journal article supplement — Cancer Res. 2023 Apr 27;83(12):1984–99. doi: 10.1158/0008-5472.CAN-21-3629 (PMC10267676; doi:10.1158/0008-5472.can-21-3629), 2023-04-27
Supplement: can-21-3629_supplementary_table_2_suppst2.pdf [file can-21-3629_supplementary_table_2_suppst2.pdf]

Suppl Table 2-top\_shared\_genes\_figure (1)

| genes           | description           | gsc1 | gsc2 | gsc3 | gsc4 | cell state   |                    |             |
|-----------------|-----------------------|------|------|------|------|--------------|--------------------|-------------|
| <b>LGALS1</b>   | Immune modulator      | 1    | 1    | 1    | 1    | Mesenchymal  |                    |             |
| <b>S100B</b>    | Glial marker          | 1    | 1    | 1    | 1    | Mesenchymal  |                    |             |
| <b>PTX3</b>     | Immune modulator      | 1    | 1    |      | 1    | Mesenchymal  | P53 signaling      |             |
| <b>Survivin</b> | Anti-apoptotic factor | 1    | 1    | 1    |      | cell cycling | myc                | mesenchymal |
| <b>ASPM</b>     | Stemness regulator    | 1    | 1    | 1    |      | cell cycling | myc                | mesenchymal |
| <b>PTTG1</b>    | Stemness regulator    | 1    | 1    | 1    |      | cell cycling | myc                | mesenchymal |
| <b>CDC20</b>    | Stemness regulator    | 1    | 1    | 1    |      | cell cycling | myc                | mesenchymal |
| <b>CDCA8</b>    | Stemness regulator    | 1    | 1    | 1    |      | cell cycling | myc                | mesenchymal |
| <b>HELLS</b>    | Stemness regulator    | 1    | 1    | 1    |      | cell cycling | myc                | mesenchymal |
| <b>NEAT1</b>    | long non-coding RNA   | 1    | 1    |      | 1    | Mesenchymal  | Hypoxia signagling |             |
